# Supplementary material
Source: PubMed Central journal article supplement (PMC2760670)

## Supplemental Material

### Cheng et al. Lysophosphatidic Acid-induced Arterial Wall Remodeling:

#### Requirement of PPAR $\gamma$ but Not LPA $_1$ or LPA $_2$ GPCR

Supplemental Figure 1. Genotyping of PPAR $\gamma^{fl/-}$  and Mx1Cre(x)PPAR $\gamma^{fl/-}$  mice. Panel A: Scheme of PPAR $\gamma$  gene arrangement upon Cre-mediated recombination. Note the position and sizes of the different allele-specific primers. Panel B: Sizes and expected product sizes of allele-specific primers. Panel C: Genotyping of WT, Mx1CreXPPAR $\gamma^{fl/-}$  mouse #23, and PPAR $\gamma^{fl/-}$  mouse #24. Panel D: RT-PCR for PPAR $\gamma$  using carotid and aortic tissues from pIpC-induced  $\Delta$ PPAR $\gamma^{fl/-}$  (mouse #23) and PPAR $\gamma^{fl/-}$  (mouse #24) mice. Note the diminished 558 bp PPAR $\gamma$  band intensity in mouse #23 compared to mouse #24. E: Q-PCR using mRNA isolated from peritoneal macrophages and carotid arteries of uninduced vehicle-injected and pIpC-induced  $\Delta$ PPAR $\gamma^{fl/-}$  mice. Note the substantial but incomplete reduction in PPAR $\gamma$  transcripts in macrophages and carotids.

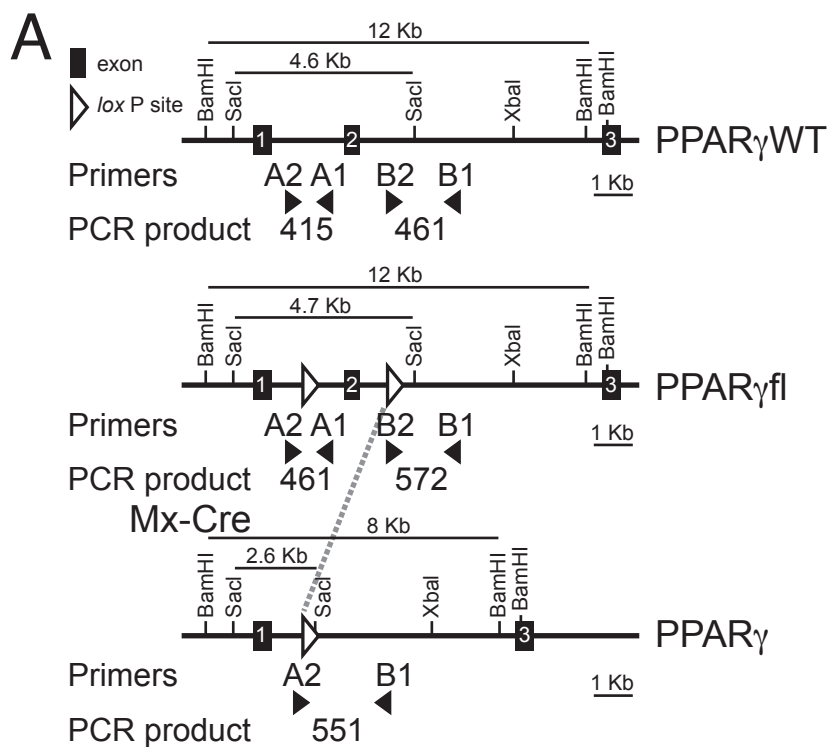

**B** Allele-specific PCR products (bp)

| Primer                         | WT   | flxed | null |
|--------------------------------|------|-------|------|
| A <sub>1</sub> -A <sub>2</sub> | 415  | 461   | none |
| B <sub>1</sub> -B <sub>2</sub> | 461  | 572   | none |
| A <sub>2</sub> -B <sub>1</sub> | none | none  | 551  |

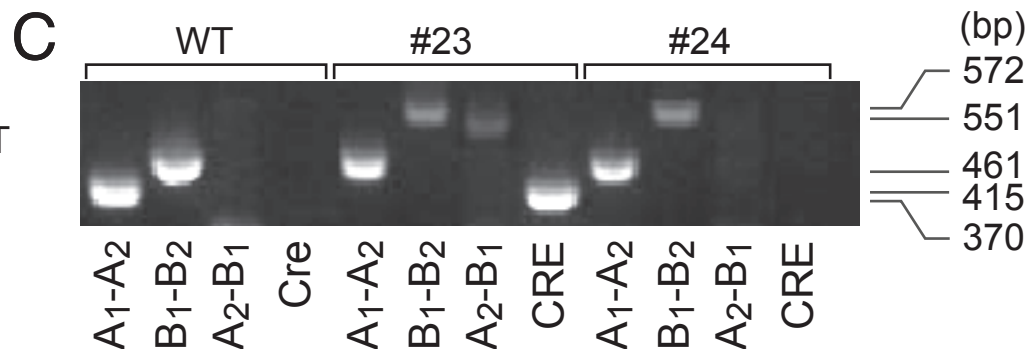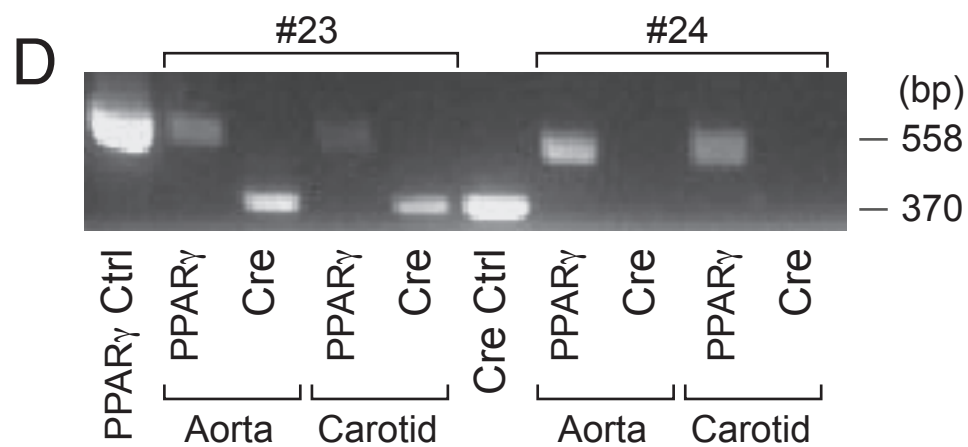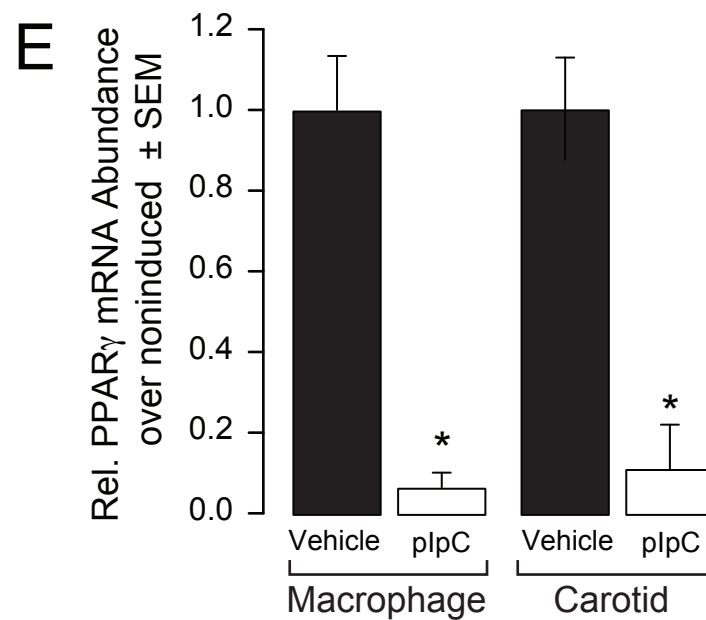

Supplement: NIHMS141022-supplement-01.pdf [file NIHMS141022-supplement-01.pdf]
